# Supplementary material for: Validation of self-report measures of narcissism against a diagnostic interview
Source: PLoS One. 2022 Apr 6;17(4):e0266540. doi: 10.1371/journal.pone.0266540 (PMC8986001; doi:10.1371/journal.pone.0266540)
Supplement: S1 Dataset — (XLSX) [file pone.0266540.s001.xlsx]

## Sheet: data
gender	age	marital_status	education	job	npd	npi	pni_grandiosity	pni_vulnerability	mdd	sad	bd	adhd	bpd	sud	total_disorder
0	29	0	12	0	0	4	11	20	0	0	0	1	0	0	1
0	35	1	15	0	0	1	3	15	1	1	0	1	1	1	5
0	34	1	13	0	0	1	23	29	0	0	0	0	1	0	1
0	24	0	11	0	0	2	5	15	1	1	0	1	1	1	5
0	23	0	18	1	0	1	27	50	1	1	0	1	1	1	5
0	52	0	15	0	0	1	22	42	1	1	0	0	1	1	4
0	21	1	18	1	0	0	15	28	0	1	1	1	1	1	5
0	22	1	11	1	0	6	34	53	1	1	0	1	1	1	5
0	31	1	17	0	0	5	33	58	1	1	0	0	1	1	4
0	42	0	19	1	0	4	23	39	0	1	1	0	1	0	3
0	24	0	14	1	0	3	35	50	1	1	0	1	1	1	5
0	34	0	20	1	0	0	16	24	0	1	1	1	0	0	3
0	39	0	18	1	0	1	25	34	1	0	0	1	1	1	4
0	29	0	18	0	0	0	16	42	1	1	0	1	0	0	3
0	21	0	15	0	0	3	37	47	1	1	0	1	1	1	5
0	22	1	15	0	0	1	22	27	1	0	0	0	1	0	2
1	58	0	11	0	0	0	38	56	0	0	1	0	0	1	2
0	19	0	15	0	0	4	42	48	1	0	0	0	0	0	1
0	37	1	14	0	0	2.25	50	58	1	0	0	1	1	1	4
1	35	0	16	0	0	1	35	39	0	1	0	1	1	1	4
0	33	1	20	1	0	0	31	43	1	1	0	1	1	1	5
0	40	1	11	0	1	9	39	28	1	0	0	1	1	1	4
0	50	1	11	0	0	5	10	16	1	0	0	1	0	1	3
0	42	1	14	1	0	5	8	21	0	0	0	1	1	1	3
0	54	1	11	0	0	4	7	11	1	0	0	1	0	0	2
0	41	1	14	0	0	1	10	19	1	0	0	1	1	1	4
0	30	0	14	0	0	4	26	45	1	0	0	1	1	0	3
1	56	1	14	1	0	3	16	23	0	0	0	1	0	1	2
0	46	0	16	0	0	5	18	24	1	0	0	1	1	1	4
1	48	0	20	1	0	9	32	20	0	1	0	1	0	0	2
1	30	1	11	0	0	6	46	51	0	0	0	1	0	0	1
0	19	1	20	1	0	5	11	11	1	1	0	1	0	0	3
0	27	0	14	1	0	2	7	21	0	0	0	1	0	1	2
1	51	1	18	1	0	3	21	25	1	0	0	1	0	0	2
0	56	1	20	0	0	1	26	16	1	0	0	1	0	0	2
1	39	1	20	1	1	6	36	46	0	1	1	1	1	0	4
0	41	0	18	0	0	5	35	44	1	0	0	0	0	1	2
0	33	0	11	0	0	3	19	9	1	0	0	1	1	1	4
0	18	0	15	1	0	6	33	45	0	0	0	1	1	0	2
0	33	1	11	1	0	2	39	29	1	0	0	1	1	1	4
1	19	0	12	0	0	0	15	7	1	0	0	1	0	1	3
0	22	0	18	1	0	1	21	32	0	0	0	0	1	1	2
0	24	1	13	0	0	2	29	22	0	1	0	1	1	1	4
0	42	1	11	0	0	0	10	20	0	1	0	1	1	1	4
0	33	1	12	1	0	4	15	33	0	0	1	1	0	1	3
0	33	1	11	0	0	0	18	32	1	0	0	1	1	0	3
1	36	1	14	0	0	5	39	48	0	0	0	1	0	0	1
0	30	0	18	0	0	0	14	24	0	0	1	0	1	1	3
0	30	1	14	0	0	1	22	35	1	0	0	1	1	1	4
0	26	0	9	0	1	7	37	57	0	1	1	0	1	1	4
0	40	1	20	0	0	2	12	12	0	0	0	1	0	0	1
0	25	0	11	0	0	0	1	9	0	0	0	1	1	0	2
0	30	1	11	0	0	0	18	36	1	0	0	0	1	1	3
1	40	1	15	0	1	11	45	68	0	1	0	0	1	0	2
0	46	1	14	1	0	6	44	60	1	0	0	1	1	1	4
0	38	1	14	0	0	1	14	18	0	0	1	1	1	1	4
0	36	1	18	0	0	2	14	33	1	1	0	0	0	0	2
1	52	0	20	0	1	3	21	18	0	0	1	1	0	1	3
0	29	1	18	1	0	6	44	58	0	1	0	0	1	1	3
1	26	0	19	1	0	4	47	64	0	1	0	1	1	1	4
0	29	0	15	1	0	4	42	43	1	0	0	0	1	1	3
0	30	0	19	1	0	8	42	59	1	0	0	0	1	1	3
0	41	0	18	1	0	1	15	17	0	0	0	1	0	0	1
0	40	1	20	1	0	3	31	38	0	0	0	1	1	1	3
0	32	0	13	0	0	5	16	17	1	0	0	0	1	1	3
1	19	0	14	1	0	5	34	34	0	0	0	1	0	0	1
0	26	0	20	1	0	1	13	25	1	1	0	0	0	1	3
0	25	1	14	0	0	0	12	39	1	0	0	0	1	0	2
1	24	0	12	0	1	8	31	54	0	1	1	1	1	0	4
0	18	1	12	1	0	3	22	23	1	0	0	1	1	1	4
0	48	1	14	0	0	4	14	19	1	0	0	1	1	0	3
0	26	0	16	1	1	10	59	80	1	0	0	1	0	0	2
0	46	1	20	1	0	3	36	36	1	0	0	1	0	0	2
0	21	0	14	1	0	7	47	47	1	0	0	1	0	1	3
0	50	1	15	1	0	1	33	44	1	0	0	1	0	0	2
1	63	0	15	0	0	4	23	42	1	0	0	0	1	0	2
1	45	0	17	0	0	3	37	39	0	0	0	1	0	1	2
0	30	0	11	1	0	4	32	41	1	0	0	1	1	1	4
1	55	1	17	0	0	1	31	41	1	0	0	0	0	1	2
1	54	1	16	0	0	4	28	43	0	0	1	1	0	1	3
0	40	1	12	0	0	0	34	47	0	0	1	1	0	1	3
1	30	0	15	0	0	5	38	21	1	0	0	0	0	0	1
0	21	0	14	0	0	5	33	47	0	0	0	1	1	1	3
0	36	1	19	0	1	13	46	46	1	1	0	0	0	1	3
0	56	1	17	1	0	0	24	19	1	0	0	0	0	1	2
0	26	0	11	1	0	2	23	35	1	0	0	0	1	1	3
0	42	0	15	1	0	3	36	46	0	1	0	0	1	1	3
1	42	0	19	1	0	5	44	45	0	1	0	1	1	1	4
1	35	1	11	0	0	3	50	78	1	0	0	1	0	0	2
0	20	0	19	1	0	2	13	27	0	0	1	1	1	1	4
1	42	1	11	0	0	7	39	56	1	0	0	1	0	1	3
0	41	1	15	1	0	2	28	40	1	1	0	1	1	0	4
0	47	1	15	0	0	2	21	34	0	1	0	1	0	0	2
0	42	1	11	0	0	5	44	62	1	0	0	1	1	1	4
0	31	1	15	1	0	7	29	46	0	0	0	0	1	1	2
0	30	0	15	1	0	2	27	26	1	0	0	0	1	1	3
0	39	1	15	1	0	0	23	38	1	0	0	0	1	0	2
0	28	1	14	1	0	1	27	41	1	0	0	1	1	0	3
0	20	0	16	1	0	5	26	44	0	0	0	0	1	0	1
0	30	1	18	0	0	3	13	12	1	0	0	1	1	1	4
1	38	1	14	1	0	2	28	40	1	0	0	0	0	0	1
1	44	0	14	1	0	0	31	41	1	1	0	1	1	1	5
0	32	1	15	1	0	1	33	45	1	0	0	0	1	1	3
1	21	0	11	1	0	1	8	11	0	0	0	1	1	1	3
1	18	0	13	1	1	7	51	60	0	0	0	1	1	1	3
1	36	0	11	0	1	6	35	40	0	0	1	1	1	1	4
0	20	1	11	1	0	8	28	28	0	1	0	0	1	1	3
0	21	0	15	1	0	11	29	59	0	0	0	1	1	1	3
0	22	0	14	1	0	3	22	31	1	0	0	0	1	0	2
0	28	0	18	1	1	8	47	65	1	0	0	0	1	0	2
0	26	0	14	1	0	2	25	26	1	0	0	0	1	1	3
0	19	0	11	1	0	7	30	35	1	0	0	1	0	0	2
1	34	1	14	0	0	6	31	39	0	0	1	1	0	1	3
1	43	1	14	0	0	3	20	21	1	0	0	1	0	1	3
0	32	1	20	1	0	1	35	30	1	0	0	0	1	0	2
1	40	0	11	0	0	6	24	30	1	0	0	1	0	1	3
1	55	1	15	0	0	1	29	41	0	0	1	1	0	0	2
1	16	0	13	1	0	9	33	41	0	0	0	1	0	1	2
0	42	0	17	1	0	5	33	40	1	0	0	1	1	1	4
0	19	0	11	0	0	4	32	48	1	1	0	0	0	0	2
0	40	1	14	1	0	2	23	26	1	0	0	0	1	1	3
1	20	0	15	1	0	8	33	36	0	0	0	1	1	0	2
0	23	0	18	1	0	4	41	54	0	0	0	1	1	1	3

## Sheet: codebook
Variable name	Description	Possible values
gender	Gender	0=female, 1=male
age	Age	years
marital_status	Marital status	0=single, 1=in a relationship
education	Level of education	years
job	Employment status	0=no job, 1=have a job
npd	Narcissistic personality disorder	0=absent, 1=present
npi	Narcissistic personality inventory total score	score
pni_grandiosity	Pathological narcissism inventory total score for grandiosity items	score
pni_vulnerability	Pathological narcissism inventory total score for vulnerability items	score
mdd	Major depressive disorder	0=absent, 1=present
sad	Social anxiety disorder	0=absent, 1=present
bd	Bipolar disorder	0=absent, 1=present
adhd	Attention deficit hyperactivity disorder	0=absent, 1=present
bpd	Borderline personality disorder	0=absent, 1=present
sud	Substance use disorder	0=absent, 1=present
total_disorder	Total number of disorders	number of disorders
